# Supplementary material for: Autonomous epithelial folding induced by an intracellular mechano–polarity feedback loop
Source: PLoS Comput Biol. 2021 Dec 6;17(12):e1009614. doi: 10.1371/journal.pcbi.1009614 (PMC8675927; doi:10.1371/journal.pcbi.1009614)
Supplement: S2 Data — (XLSX) [file pcbi.1009614.s006.xlsx]

## Sheet: Neighboring cells
Time (second)	average cell height (µm)	s.d. cell height (µm)	average normalized Bazooka peak position	s.d. normalized Bazooka peak position
-600	32.6042	1.69131	0.171103	0.0339302
-580	33.0208	1.5638	0.174103	0.00967156
-560	33.6458	1.65851	0.207492	0.0246872
-540	34.2188	1.63504	0.178551	0.0172157
-520	34.7396	1.75506	0.180391	0.0183002
-500	35.2604	1.7895	0.155192	0.0290554
-480	35.8333	1.75506	0.182704	0.0173612
-460	36.4062	1.7223	0.16584	0.0217195
-440	36.9271	1.66218	0.174328	0.0162841
-420	37.3958	1.5638	0.160267	0.030235
-400	37.8646	1.48369	0.166267	0.0316686
-380	38.3854	1.42064	0.165502	0.0166351
-360	38.9062	1.44478	0.166241	0.0406603
-340	39.5312	1.53093	0.142846	0.0368127
-320	40.0521	1.4713	0.161782	0.0141282
-300	40.625	1.43631	0.141346	0.0234113
-280	41.3021	1.57159	0.172185	0.0298343
-260	41.875	1.34411	0.164305	0.0309311
-240	42.5	1.24511	0.169265	0.0306864
-220	42.9688	1.1213	0.165749	0.0339731
-200	43.75	1.16927	0.168826	0.0300732
-180	44.1667	1.04427	0.154576	0.0177485
-160	44.6354	1.06166	0.163203	0.020255
-140	45.0521	1.00252	0.164909	0.0380925
-120	45.4167	0.95257	0.161284	0.0268751
-100	46.0417	0.776024	0.166028	0.0209728
-80	46.1458	1.02658	0.17138	0.0124038
-60	46.4583	0.893043	0.165544	0.0168559
-40	46.9271	0.836582	0.147329	0.0142421
-20	47.1875	0.773398	0.147606	0.0148236
0	47.3438	0.876951	0.157509	0.0199707
20	47.7604	0.990268	0.161259	0.0176684
40	48.1771	0.893043	0.152244	0.00763219
60	48.2812	0.943988	0.161783	0.00960266
80	48.5417	0.886182	0.137186	0.0157667
100	48.5938	0.834147	0.136927	0.01776
120	48.8542	1.06166	0.127708	0.0127987
140	48.8021	1.10669	0.122581	0.0162282

## Sheet: Initiating cells
Time (second)	average cell height (µm)	s.d. cell height (µm)	average normalized Bazooka peak position	s.d. normalized Bazooka peak position
-600	32.0312	1.7223	0.187657	0.0135013
-580	32.5521	1.5638	0.185608	0.028276
-560	33.0729	1.59472	0.209674	0.0038488
-540	33.6979	1.59472	0.194783	0.0256942
-520	34.1667	1.69131	0.202786	0.00288803
-500	34.7396	1.5638	0.18465	0.020957
-480	35.1562	1.53093	0.200314	0.0201732
-460	35.7812	1.62755	0.204118	0.0215059
-440	36.3542	1.59472	0.191364	0.0405549
-420	36.875	1.62755	0.201598	0.0140653
-400	37.5521	1.65851	0.202628	0.011577
-380	37.9688	1.7223	0.208995	0.0162003
-360	38.4375	1.62755	0.189815	0.0169923
-340	39.1146	1.4713	0.189008	0.00507857
-320	39.6875	1.53491	0.203697	0.0144905
-300	40.1042	1.50005	0.213051	0.0105426
-280	40.6771	1.4713	0.220929	0.0148257
-260	41.3021	1.38144	0.217175	0.00730933
-240	41.9271	1.28055	0.214483	0.0336896
-220	42.4479	1.30884	0.226645	0.0336824
-200	42.8646	1.27578	0.237225	0.0310517
-180	43.3333	1.09002	0.248064	0.026933
-160	44.0104	1.02658	0.262965	0.016612
-140	44.375	0.96319	0.26001	0.0218853
-120	44.5312	1.01262	0.267309	0.0271798
-100	45.1562	0.904362	0.290113	0.0263417
-80	45.5729	0.939668	0.294198	0.0211876
-60	45.9375	0.883883	0.306925	0.0319834
-40	46.0938	0.796722	0.304419	0.022351
-20	46.6146	0.752059	0.312166	0.0203658
0	46.7708	0.675077	0.308479	0.000838862
20	47.0312	0.672057	0.320105	0.00318908
40	47.3958	0.752059	0.311194	0.00969389
60	47.5521	0.647386	0.326637	0.0172331
80	47.6562	0.724501	0.338059	0.0179026
100	47.9688	0.506308	0.345519	0.0193549
120	48.0729	0.278049	0.345768	0.0212484
140	48.3854	0.168769	0.353135	0.0203273
